# Supplementary material for: Persistent Airway Hyperresponsiveness Following Recovery from Infection with Pneumonia Virus of Mice
Source: Viruses. 2021 Apr 22;13(5):728. doi: 10.3390/v13050728 (PMC8143513; doi:10.3390/v13050728)
Supplement: Supplementary file 1 [file viruses-13-00728-s001.zip › viruses-1184189-supplementary.pdf]

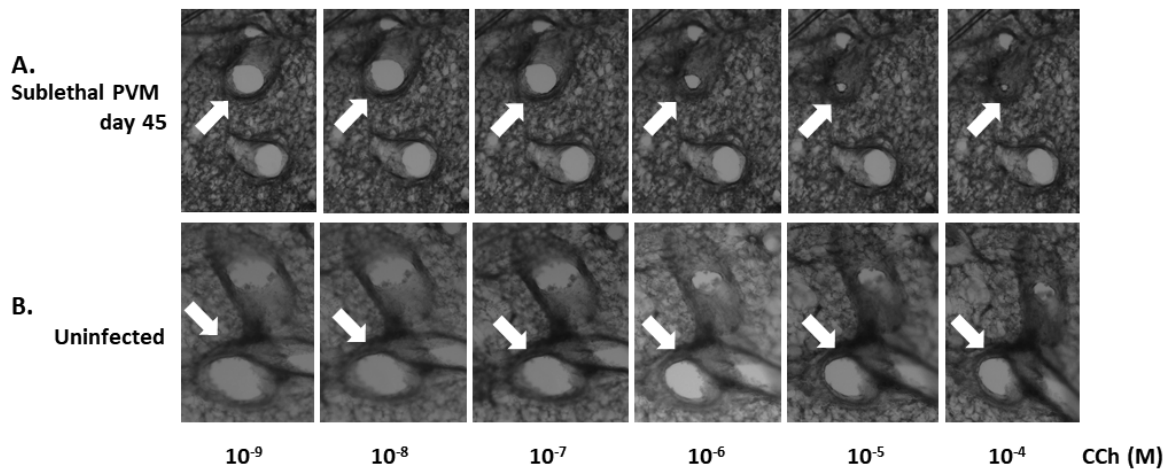

**Supplemental Figure S1. Airway contraction in precision-cut lung slices (PCLS)**

PCLS were prepared on day 45 from uninfected mice and mice inoculated on day 0 with a sublethal dose of PVM. As shown in (A), the target airway (indicated by white arrows) in a mouse that recovered from a sublethal PVM infection underwent profound contraction in response to increasing concentrations of carbachol (Cch), compared to (B) the limited responses of similar airways from uninfected mice. All images were prepared at 5x original magnification. Quantitative data are shown in Figure 5B.
